# Supplementary material for: Evaluation of Computational Chemistry Methods for Predicting Redox Potentials of Quinone-Based Cathodes for Li-Ion Batteries
Source: MDPI journal article supplement (doi:10.3390/batteries7040071), 2021-10-28
Supplement: s1 [file s1]

# Supporting Information

## Evaluation of Computational Chemistry Methods for Predicting Redox Potentials of Quinone-based Cathodes for Li-ion Batteries

Xuan Zhou <sup>1,2,3</sup>, Abhishek Khetan <sup>1,2,4</sup>, and Süleyman Er <sup>1,2,\*</sup>

<sup>1</sup> DIFFER – Dutch Institute for Fundamental Energy Research, De Zaale 20, 5612 AJ Eindhoven, the Netherlands

<sup>2</sup> CCER – Center for Computational Energy Research, De Zaale 20, 5612 AJ Eindhoven, the Netherlands

<sup>3</sup> Department of Applied Physics, Eindhoven University of Technology, 5600 MB Eindhoven, the Netherlands

<sup>4</sup> Present address: Fuel Science Center, RWTH Aachen University, 52062 Aachen, Germany

\* E-mail: [S.Er@diffier.nl](mailto:S.Er@diffier.nl)

The dielectric constant, molecular weight and density of binary solvents can be calculated by the below three equations using the available information on pure solvents [S1].

For a mixture solvent the dielectric constant,  $\varepsilon_{mix}$ , is calculated as [S2,S3]:

$$\varepsilon_{mix} = \sum x_i \varepsilon_i$$

where  $x_i$  is the molar ratio and  $\varepsilon_i$  is the dielectric constant of solvent  $i$ , respectively,

The molecular weight is determined as the equation:

$$M_{mix} = \sum x_i M_i$$

where  $M_{mix}$  and  $M_i$  represent the molecular density of a binary solvent and solvent  $i$ , separately.

The density of the mixture liquids can be given by:

$$\rho_{mix} = \left( \sum \frac{w_i}{\rho_i} \right)^{-1}$$

where  $\rho_{mix}$  and  $\rho_i$  are the density of mixture liquids, and solvent  $i$ .  $w_i$  is the weight fraction of pure solvent.

**Table S1.** Physical properties, including dielectric constant, molecular weight, and density, of organic electrolytes and their mixtures corresponding to the experimental datasets.

| Solvent             | $\epsilon$ (25 °C) | Molecular weight<br>(g/mol) | Density (g/cm <sup>3</sup> ) |
|---------------------|--------------------|-----------------------------|------------------------------|
| Ethylene carbonate  | 89.78              | 88.06                       | 1.32                         |
| Diethyl carbonate   | 2.81               | 118.13                      | 0.97                         |
| Dimethyl carbonate  | 3.11               | 90.08                       | 1.06                         |
| Tetraglyme          | 7.79               | 222.28                      | 1.01                         |
| Propylene carbonate | 64.92              | 102.09                      | 1.20                         |
| EC+DEC (v/v=3:7)    | 41.00              | 104.93                      | 1.08                         |
| EC+DMC (w/w=1:1)    | 46.98              | 89.06                       | 1.18                         |
| EC+DMC (v/v=1:1)    | 51.66              | 88.95                       | 1.19                         |
| EC+DMC (v/v=3:7)    | 33.71              | 89.37                       | 1.14                         |

The abbreviations of organic solvents in the above table are denoted as: EC = ethylene carbonate, DEC = diethyl carbonate, DMC = dimethyl carbonate, PC = propylene carbonate. w/w and v/v indicate the mass fraction and volume fraction of two solvents, respectively.

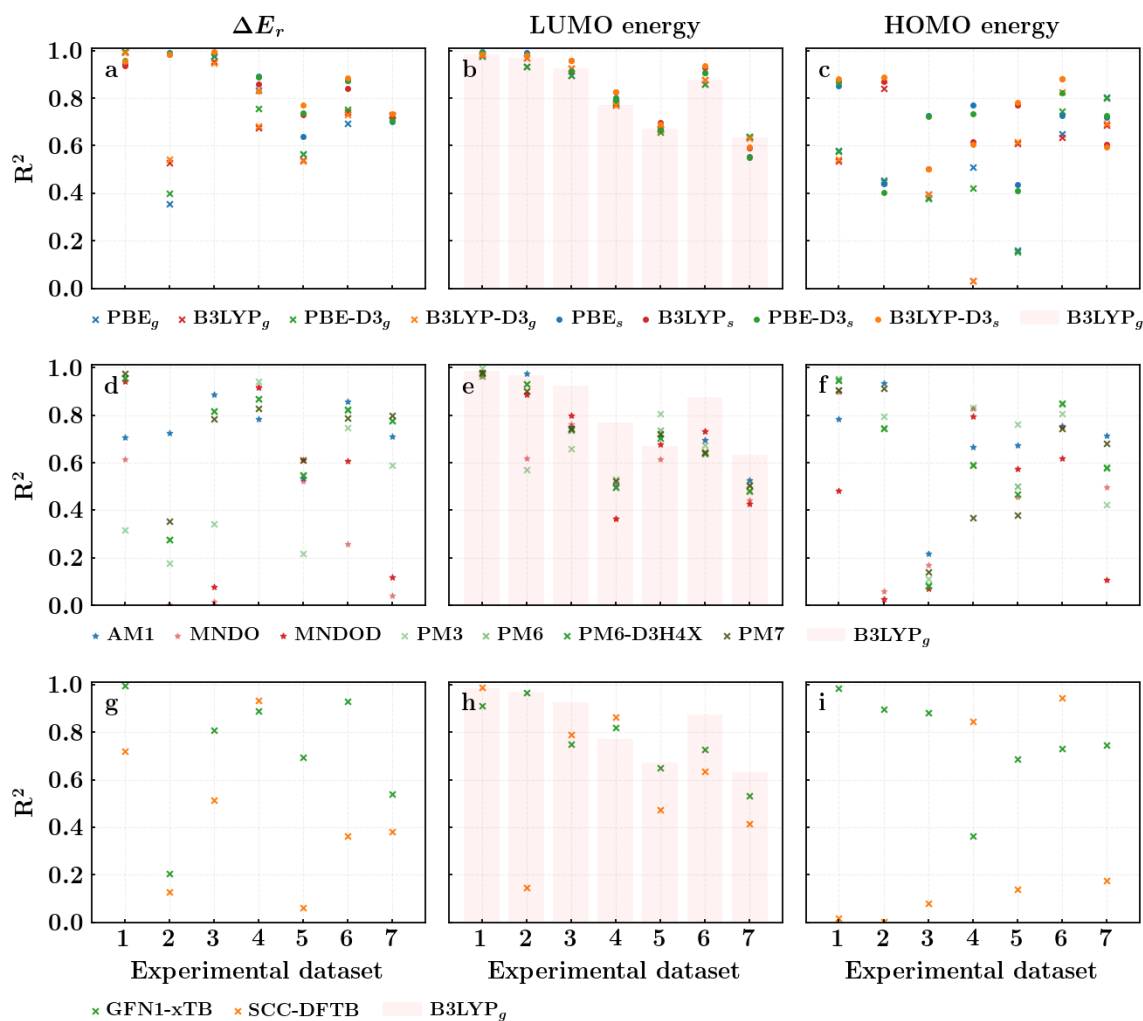

**Figure S1.**  $R^2$  of three descriptors:  $\Delta E_r$ , LUMO energy, and HOMO energy. The computational data is calculated by using (a-c) DFT, (d-f) SEQM, and (g-i) DFTB methods for the seven experimental datasets. PBE<sub>g</sub> and PBE<sub>s</sub> represent single point calculations in gas (g) and solvent (s) phases, respectively. The shaded vertical bars in (b, e and h) show the fully B3LYP<sub>g</sub> calculated data.

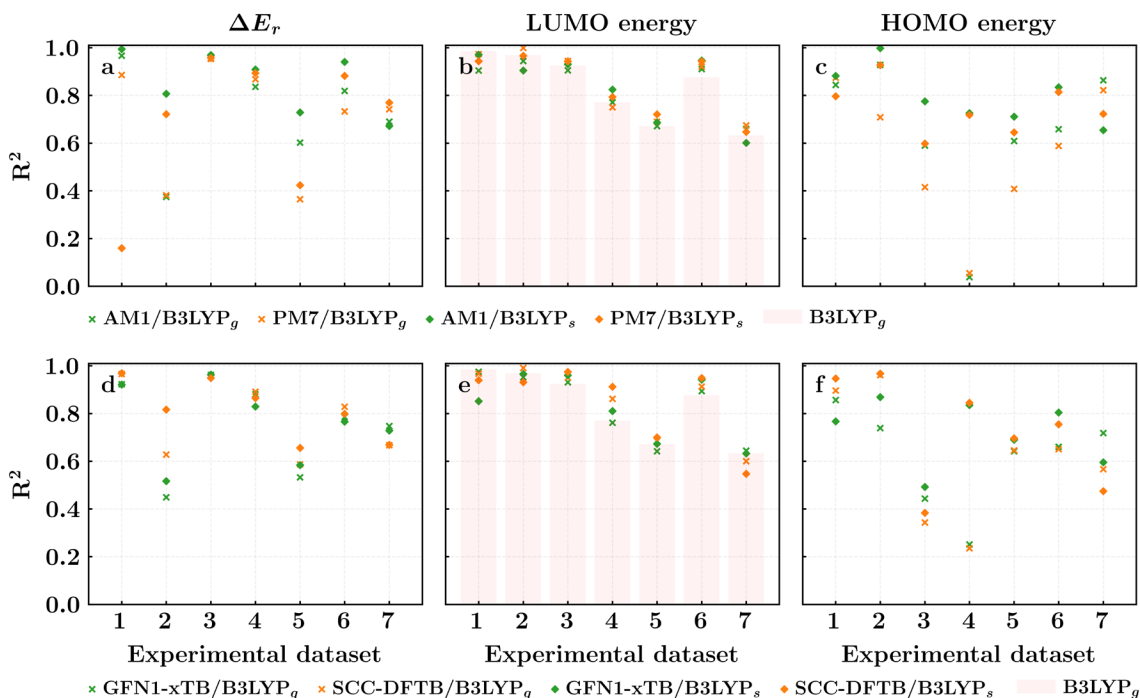

**Figure S2.**  $R^2$  of three descriptors:  $\Delta E_r$ , LUMO energy, and HOMO energy. The computational data is calculated by using (a-c) hybrid SEQM/DFT scheme and (d-e) hybrid DFTB/DFT scheme for the seven experimental datasets. Accordingly, AM1/B3LYP<sub>g</sub> and AM1/B3LYP<sub>s</sub> imply that the molecules are optimized only with AM1 and their energies are calculated by using B3LYP functional either without or with solvation effect, respectively. The shaded vertical bars in (b, e and h) show the fully B3LYP<sub>g</sub> calculated data.

**Table S2.** NRMSE of  $\Delta E_r$  as computed with DFT, SEQM, DFTB and hybrid schemes of SEQM (or DFTB) and DFT methods for the seven datasets.

|                                 |                                   | No.1   | No.2   | No.3   | No.4   | No.5   | No.6   | No.7   |
|---------------------------------|-----------------------------------|--------|--------|--------|--------|--------|--------|--------|
| <b>DFT</b>                      | <b>PBE<sub>g</sub></b>            | 3.17%  | 29.78% | 5.10%  | 13.54% | 21.32% | 19.37% | 18.29% |
|                                 | <b>B3LYP<sub>g</sub></b>          | 3.12%  | 25.47% | 7.13%  | 18.90% | 21.96% | 17.72% | 18.24% |
|                                 | <b>PBE-D3<sub>g</sub></b>         | 3.24%  | 28.79% | 5.13%  | 16.45% | 21.34% | 17.36% | 18.22% |
|                                 | <b>B3LYP-D3<sub>g</sub></b>       | 3.87%  | 25.09% | 7.47%  | 18.67% | 22.04% | 18.13% | 18.12% |
|                                 | <b>PBE<sub>s</sub></b>            | 9.81%  | 3.82%  | 4.07%  | 10.94% | 19.42% | 12.48% | 19.09% |
|                                 | <b>B3LYP<sub>s</sub></b>          | 10.65% | 4.86%  | 2.94%  | 12.45% | 16.81% | 13.93% | 18.32% |
|                                 | <b>PBE-D3<sub>s</sub></b>         | 8.39%  | 4.02%  | 3.90%  | 11.10% | 16.50% | 12.34% | 18.96% |
|                                 | <b>B3LYP-D3<sub>s</sub></b>       | 8.72%  | 4.54%  | 2.70%  | 13.76% | 15.52% | 11.89% | 18.01% |
| <b>SEQM</b>                     | <b>AM1</b>                        | 22.53% | 19.48% | 11.05% | 15.44% | 22.02% | 13.17% | 18.76% |
|                                 | <b>MNDO</b>                       | 25.72% | 37.08% | 32.48% | 9.33%  | 22.31% | 30.06% | 34.13% |
|                                 | <b>MNDOD</b>                      | 9.94%  | 37.07% | 31.46% | 9.60%  | 20.14% | 21.89% | 32.74% |
|                                 | <b>PM3</b>                        | 34.25% | 33.60% | 26.54% | 8.02%  | 28.55% | 17.55% | 22.38% |
|                                 | <b>PM6</b>                        | 8.48%  | 31.58% | 14.01% | 12.12% | 21.74% | 14.71% | 16.53% |
|                                 | <b>PM6-D3H4X</b>                  | 8.62%  | 31.58% | 14.01% | 12.10% | 21.69% | 14.68% | 16.53% |
|                                 | <b>PM7</b>                        | 6.66%  | 29.81% | 15.22% | 13.72% | 20.10% | 16.11% | 15.61% |
| <b>DFTB</b>                     | <b>GFN1-xTB</b>                   | 2.70%  | 33.04% | 14.33% | 11.02% | 17.81% | 9.27%  | 23.66% |
|                                 | <b>SCC-DFTB</b>                   | 21.88% | 34.60% | 22.82% | 8.56%  | 31.26% | 27.86% | 27.42% |
| <b>SEQM/<br/>DFT<br/>hybrid</b> | <b>AM1/B3LYP<sub>g</sub></b>      | 7.55%  | 29.33% | 6.94%  | 13.43% | 20.35% | 14.85% | 19.40% |
|                                 | <b>PM7/B3LYP<sub>g</sub></b>      | 14.03% | 29.17% | 7.09%  | 12.06% | 25.72% | 18.02% | 17.71% |
|                                 | <b>AM1/B3LYP<sub>s</sub></b>      | 3.29%  | 16.30% | 5.76%  | 10.04% | 16.82% | 8.52%  | 19.97% |
|                                 | <b>PM7/B3LYP<sub>s</sub></b>      | 38.01% | 19.57% | 6.79%  | 10.83% | 24.50% | 11.99% | 16.74% |
| <b>DFTB/<br/>DFT<br/>hybrid</b> | <b>GFN1-xTB/B3LYP<sub>g</sub></b> | 11.52% | 27.53% | 6.40%  | 11.46% | 22.06% | 16.17% | 17.51% |
|                                 | <b>SCC-DFTB/B3LYP<sub>g</sub></b> | 7.67%  | 22.61% | 6.87%  | 10.93% | 20.74% | 14.43% | 20.10% |
|                                 | <b>GFN1-xTB/B3LYP<sub>s</sub></b> | 40.50% | 28.39% | 8.42%  | 9.25%  | 20.21% | 9.12%  | 17.62% |
|                                 | <b>SCC-DFTB/B3LYP<sub>s</sub></b> | 33.16% | 27.47% | 16.83% | 10.12% | 14.03% | 11.66% | 26.67% |

**Table S3.** NRMSE of LUMO energy of the reactant molecules as computed with DFT, SEQM, DFTB and hybrid schemes of SEQM (or DFTB) and DFT methods for the seven datasets.

|                                 |                                   | No.1   | No.2   | No.3   | No.4   | No.5   | No.6   | No.7   |
|---------------------------------|-----------------------------------|--------|--------|--------|--------|--------|--------|--------|
| <b>DFT</b>                      | <b>PBE<sub>g</sub></b>            | 6.40%  | 9.76%  | 10.59% | 15.49% | 18.64% | 13.09% | 21.02% |
|                                 | <b>B3LYP<sub>g</sub></b>          | 5.08%  | 6.59%  | 9.01%  | 15.91% | 18.52% | 12.30% | 21.13% |
|                                 | <b>PBE-D3<sub>g</sub></b>         | 6.64%  | 9.73%  | 10.56% | 15.59% | 18.89% | 13.09% | 21.02% |
|                                 | <b>B3LYP-D3<sub>g</sub></b>       | 5.52%  | 6.52%  | 9.05%  | 15.96% | 18.62% | 12.28% | 21.14% |
|                                 | <b>PBE<sub>s</sub></b>            | 2.90%  | 3.53%  | 9.82%  | 14.81% | 18.57% | 10.73% | 23.29% |
|                                 | <b>B3LYP<sub>s</sub></b>          | 4.96%  | 5.30%  | 6.71%  | 13.92% | 17.72% | 9.26%  | 22.27% |
|                                 | <b>PBE-D3<sub>s</sub></b>         | 4.10%  | 5.11%  | 9.57%  | 14.90% | 18.63% | 10.72% | 23.34% |
|                                 | <b>B3LYP-D3<sub>s</sub></b>       | 5.56%  | 5.47%  | 6.70%  | 13.81% | 17.97% | 8.73%  | 22.21% |
| <b>SEQM</b>                     | <b>AM1</b>                        | 6.21%  | 6.08%  | 16.35% | 23.45% | 17.36% | 19.29% | 23.97% |
|                                 | <b>MNDO</b>                       | 7.76%  | 22.95% | 16.04% | 26.45% | 20.02% | 18.00% | 26.07% |
|                                 | <b>MNDOD</b>                      | 6.06%  | 12.53% | 14.76% | 26.47% | 18.36% | 18.01% | 26.34% |
|                                 | <b>PM3</b>                        | 2.57%  | 24.29% | 19.11% | 22.70% | 14.19% | 19.94% | 24.40% |
|                                 | <b>PM6</b>                        | 8.08%  | 9.77%  | 16.77% | 23.54% | 16.60% | 21.00% | 25.14% |
|                                 | <b>PM6-D3H4X</b>                  | 6.50%  | 9.77%  | 16.73% | 23.57% | 17.57% | 20.88% | 25.12% |
|                                 | <b>PM7</b>                        | 6.31%  | 11.68% | 16.62% | 22.91% | 17.04% | 20.80% | 24.58% |
| <b>DFTB</b>                     | <b>GFN1-xTB</b>                   | 12.48% | 6.84%  | 16.37% | 14.09% | 19.14% | 18.27% | 23.79% |
|                                 | <b>SCC-DFTB</b>                   | 4.38%  | 34.27% | 15.07% | 12.32% | 23.44% | 21.07% | 26.65% |
| <b>SEQM/<br/>DFT<br/>hybrid</b> | <b>AM1/B3LYP<sub>g</sub></b>      | 12.81% | 8.78%  | 10.10% | 15.88% | 18.50% | 10.43% | 20.33% |
|                                 | <b>PM7/B3LYP<sub>g</sub></b>      | 6.89%  | 1.33%  | 7.76%  | 16.60% | 17.96% | 9.82%  | 19.89% |
|                                 | <b>AM1/B3LYP<sub>s</sub></b>      | 7.13%  | 11.49% | 8.63%  | 13.90% | 18.06% | 8.09%  | 22.02% |
|                                 | <b>PM7/B3LYP<sub>s</sub></b>      | 9.85%  | 6.87%  | 7.82%  | 15.09% | 17.06% | 8.36%  | 20.70% |
| <b>DFTB/<br/>DFT<br/>hybrid</b> | <b>GFN1-xTB/B3LYP<sub>g</sub></b> | 6.57%  | 8.13%  | 8.59%  | 16.20% | 19.32% | 11.36% | 20.78% |
|                                 | <b>SCC-DFTB/B3LYP<sub>g</sub></b> | 7.54%  | 3.56%  | 7.28%  | 12.35% | 18.12% | 10.30% | 22.03% |
|                                 | <b>GFN1-xTB/B3LYP<sub>s</sub></b> | 15.95% | 6.85%  | 6.51%  | 14.44% | 18.46% | 8.41%  | 21.12% |
|                                 | <b>SCC-DFTB/B3LYP<sub>s</sub></b> | 10.18% | 9.75%  | 5.22%  | 9.85%  | 17.69% | 7.90%  | 23.45% |

**Table S4.** NRMSE of HOMO energy of the product molecules as computed with DFT, SEQM, DFTB and hybrid schemes of SEQM (or DFTB) and DFT methods for the seven datasets.

|                                 |                                   | No.1   | No.2   | No.3   | No.4   | No.5   | No.6   | No.7   |
|---------------------------------|-----------------------------------|--------|--------|--------|--------|--------|--------|--------|
| <b>DFT</b>                      | <b>PBE<sub>g</sub></b>            | 26.90% | 27.37% | 25.79% | 23.20% | 29.58% | 20.67% | 15.48% |
|                                 | <b>B3LYP<sub>g</sub></b>          | 28.25% | 14.86% | 25.49% | 32.66% | 20.18% | 21.07% | 19.54% |
|                                 | <b>PBE-D3<sub>g</sub></b>         | 26.98% | 27.60% | 25.86% | 25.26% | 29.69% | 17.58% | 15.55% |
|                                 | <b>B3LYP-D3<sub>g</sub></b>       | 28.05% | 13.09% | 25.44% | 32.67% | 20.04% | 14.60% | 19.29% |
|                                 | <b>PBE<sub>s</sub></b>            | 15.90% | 27.81% | 17.17% | 15.86% | 24.27% | 18.27% | 18.44% |
|                                 | <b>B3LYP<sub>s</sub></b>          | 14.78% | 13.30% | 23.07% | 20.60% | 15.52% | 12.11% | 21.87% |
|                                 | <b>PBE-D3<sub>s</sub></b>         | 15.26% | 28.67% | 17.29% | 17.08% | 24.77% | 14.71% | 18.22% |
|                                 | <b>B3LYP-D3<sub>s</sub></b>       | 14.37% | 12.50% | 23.07% | 20.82% | 15.05% | 12.09% | 22.23% |
| <b>SEQM</b>                     | <b>AM1</b>                        | 19.29% | 9.54%  | 28.98% | 19.12% | 18.40% | 17.33% | 18.68% |
|                                 | <b>MNDO</b>                       | 13.38% | 35.97% | 29.81% | 13.76% | 23.84% | 17.45% | 24.71% |
|                                 | <b>MNDOD</b>                      | 29.80% | 36.62% | 31.58% | 14.99% | 21.09% | 21.57% | 32.92% |
|                                 | <b>PM3</b>                        | 12.81% | 16.74% | 30.86% | 13.62% | 15.73% | 15.32% | 26.48% |
|                                 | <b>PM6</b>                        | 8.97%  | 18.64% | 31.33% | 21.20% | 22.83% | 13.63% | 22.55% |
|                                 | <b>PM6-D3H4X</b>                  | 9.84%  | 18.83% | 31.38% | 21.25% | 23.53% | 13.53% | 22.66% |
|                                 | <b>PM7</b>                        | 12.81% | 10.88% | 30.36% | 26.40% | 25.41% | 17.68% | 19.73% |
| <b>DFTB</b>                     | <b>GFN1-xTB</b>                   | 5.18%  | 11.88% | 11.24% | 26.51% | 18.08% | 18.12% | 17.60% |
|                                 | <b>SCC-DFTB</b>                   | 41.05% | 37.01% | 31.37% | 13.11% | 29.94% | 8.19%  | 31.63% |
| <b>SEQM/<br/>DFT<br/>hybrid</b> | <b>AM1/B3LYP<sub>g</sub></b>      | 16.40% | 9.92%  | 20.95% | 32.53% | 20.18% | 20.39% | 12.89% |
|                                 | <b>PM7/B3LYP<sub>g</sub></b>      | 14.68% | 20.02% | 25.03% | 32.25% | 24.83% | 22.37% | 14.71% |
|                                 | <b>AM1/B3LYP<sub>s</sub></b>      | 14.27% | 1.74%  | 15.53% | 17.37% | 17.36% | 14.20% | 20.50% |
|                                 | <b>PM7/B3LYP<sub>s</sub></b>      | 18.71% | 10.03% | 20.75% | 17.62% | 19.23% | 15.03% | 18.37% |
| <b>DFTB/<br/>DFT<br/>hybrid</b> | <b>GFN1-xTB/B3LYP<sub>g</sub></b> | 15.69% | 18.94% | 24.41% | 28.70% | 19.32% | 20.31% | 18.50% |
|                                 | <b>SCC-DFTB/B3LYP<sub>g</sub></b> | 13.36% | 7.35%  | 26.52% | 29.01% | 19.21% | 20.61% | 22.95% |
|                                 | <b>GFN1-xTB/B3LYP<sub>s</sub></b> | 20.01% | 13.42% | 23.32% | 13.46% | 17.97% | 15.42% | 22.16% |
|                                 | <b>SCC-DFTB/B3LYP<sub>s</sub></b> | 9.58%  | 6.72%  | 25.69% | 13.05% | 17.78% | 17.26% | 25.26% |

**Table S5.**  $R^2$  of  $\Delta E_r$  as computed with DFT, SEQM, DFTB and hybrid schemes of SEQM (or DFTB) and DFT methods for the seven datasets.

|                                 |                                   | No.1  | No.2    | No.3  | No.4 | No.5  | No.6 | No.7  |
|---------------------------------|-----------------------------------|-------|---------|-------|------|-------|------|-------|
| <b>DFT</b>                      | <b>PBE<sub>g</sub></b>            | 0.99  | 0.36    | 0.98  | 0.83 | 0.56  | 0.69 | 0.72  |
|                                 | <b>B3LYP<sub>g</sub></b>          | 0.99  | 0.53    | 0.95  | 0.68 | 0.54  | 0.74 | 0.73  |
|                                 | <b>PBE-D3<sub>g</sub></b>         | 0.99  | 0.40    | 0.98  | 0.75 | 0.56  | 0.75 | 0.73  |
|                                 | <b>B3LYP-D3<sub>g</sub></b>       | 0.99  | 0.54    | 0.95  | 0.68 | 0.53  | 0.73 | 0.73  |
|                                 | <b>PBE<sub>s</sub></b>            | 0.94  | 0.99    | 0.98  | 0.89 | 0.64  | 0.87 | 0.70  |
|                                 | <b>B3LYP<sub>s</sub></b>          | 0.93  | 0.98    | 0.99  | 0.86 | 0.73  | 0.84 | 0.72  |
|                                 | <b>PBE-D3<sub>s</sub></b>         | 0.96  | 0.99    | 0.99  | 0.89 | 0.74  | 0.87 | 0.70  |
|                                 | <b>B3LYP-D3<sub>s</sub></b>       | 0.96  | 0.99    | 0.99  | 0.83 | 0.77  | 0.88 | 0.73  |
| <b>SEQM</b>                     | <b>AM1</b>                        | 0.70  | 0.72    | 0.89  | 0.78 | 0.53  | 0.86 | 0.71  |
|                                 | <b>MNDO</b>                       | 0.62  | 0.00013 | 0.015 | 0.92 | 0.52  | 0.26 | 0.041 |
|                                 | <b>MNDOD</b>                      | 0.94  | 0.00041 | 0.076 | 0.92 | 0.61  | 0.61 | 0.12  |
|                                 | <b>PM3</b>                        | 0.32  | 0.18    | 0.34  | 0.94 | 0.22  | 0.75 | 0.59  |
|                                 | <b>PM6</b>                        | 0.96  | 0.27    | 0.82  | 0.87 | 0.55  | 0.82 | 0.78  |
|                                 | <b>PM6-D3H4X</b>                  | 0.96  | 0.27    | 0.82  | 0.87 | 0.55  | 0.82 | 0.78  |
|                                 | <b>PM7</b>                        | 0.97  | 0.35    | 0.78  | 0.83 | 0.61  | 0.79 | 0.80  |
| <b>DFTB</b>                     | <b>GFN1-xTB</b>                   | 0.996 | 0.21    | 0.81  | 0.89 | 0.70  | 0.93 | 0.54  |
|                                 | <b>SCC-DFTB</b>                   | 0.72  | 0.13    | 0.51  | 0.93 | 0.062 | 0.36 | 0.38  |
| <b>SEQM/<br/>DFT<br/>hybrid</b> | <b>AM1/B3LYP<sub>g</sub></b>      | 0.97  | 0.37    | 0.96  | 0.84 | 0.60  | 0.82 | 0.69  |
|                                 | <b>PM7/B3LYP<sub>g</sub></b>      | 0.89  | 0.38    | 0.95  | 0.87 | 0.37  | 0.73 | 0.74  |
|                                 | <b>AM1/B3LYP<sub>s</sub></b>      | 0.99  | 0.81    | 0.97  | 0.91 | 0.73  | 0.94 | 0.67  |
|                                 | <b>PM7/B3LYP<sub>s</sub></b>      | 0.16  | 0.72    | 0.96  | 0.89 | 0.42  | 0.88 | 0.77  |
| <b>DFTB/<br/>DFT<br/>hybrid</b> | <b>GFN1-xTB/B3LYP<sub>g</sub></b> | 0.92  | 0.45    | 0.96  | 0.88 | 0.53  | 0.79 | 0.75  |
|                                 | <b>SCC-DFTB/B3LYP<sub>g</sub></b> | 0.96  | 0.63    | 0.96  | 0.89 | 0.59  | 0.83 | 0.67  |
|                                 | <b>GFN1-xTB/B3LYP<sub>s</sub></b> | 0.046 | 0.41    | 0.93  | 0.92 | 0.61  | 0.93 | 0.74  |
|                                 | <b>SCC-DFTB/B3LYP<sub>s</sub></b> | 0.36  | 0.45    | 0.74  | 0.91 | 0.81  | 0.89 | 0.41  |

**Table S6.**  $R^2$  of LUMO energy of the reactant molecules as computed with DFT, SEQM, DFTB and hybrid schemes of SEQM (or DFTB) and DFT methods for the seven datasets.

|                                 |                                   | No.1  | No.2  | No.3 | No.4 | No.5 | No.6 | No.7 |
|---------------------------------|-----------------------------------|-------|-------|------|------|------|------|------|
| <b>DFT</b>                      | <b>PBE<sub>g</sub></b>            | 0.98  | 0.93  | 0.90 | 0.78 | 0.67 | 0.86 | 0.64 |
|                                 | <b>B3LYP<sub>g</sub></b>          | 0.98  | 0.97  | 0.92 | 0.77 | 0.67 | 0.88 | 0.63 |
|                                 | <b>PBE-D3<sub>g</sub></b>         | 0.97  | 0.93  | 0.90 | 0.78 | 0.66 | 0.86 | 0.64 |
|                                 | <b>B3LYP-D3<sub>g</sub></b>       | 0.98  | 0.97  | 0.92 | 0.77 | 0.67 | 0.88 | 0.63 |
|                                 | <b>PBE<sub>s</sub></b>            | 0.995 | 0.99  | 0.91 | 0.80 | 0.67 | 0.91 | 0.55 |
|                                 | <b>B3LYP<sub>s</sub></b>          | 0.99  | 0.98  | 0.96 | 0.82 | 0.70 | 0.93 | 0.59 |
|                                 | <b>PBE-D3<sub>s</sub></b>         | 0.99  | 0.98  | 0.91 | 0.80 | 0.67 | 0.91 | 0.55 |
|                                 | <b>B3LYP-D3<sub>s</sub></b>       | 0.98  | 0.98  | 0.96 | 0.83 | 0.69 | 0.94 | 0.59 |
| <b>SEQM</b>                     | <b>AM1</b>                        | 0.98  | 0.97  | 0.75 | 0.50 | 0.71 | 0.69 | 0.53 |
|                                 | <b>MNDO</b>                       | 0.96  | 0.62  | 0.76 | 0.36 | 0.62 | 0.73 | 0.44 |
|                                 | <b>MNDOD</b>                      | 0.98  | 0.89  | 0.80 | 0.36 | 0.68 | 0.73 | 0.43 |
|                                 | <b>PM3</b>                        | 0.996 | 0.57  | 0.66 | 0.53 | 0.81 | 0.67 | 0.51 |
|                                 | <b>PM6</b>                        | 0.96  | 0.93  | 0.74 | 0.50 | 0.74 | 0.64 | 0.48 |
|                                 | <b>PM6-D3H4X</b>                  | 0.98  | 0.93  | 0.74 | 0.50 | 0.70 | 0.64 | 0.48 |
|                                 | <b>PM7</b>                        | 0.98  | 0.90  | 0.74 | 0.52 | 0.72 | 0.64 | 0.50 |
| <b>DFTB</b>                     | <b>GFN1-xTB</b>                   | 0.91  | 0.97  | 0.75 | 0.82 | 0.65 | 0.73 | 0.53 |
|                                 | <b>SCC-DFTB</b>                   | 0.99  | 0.15  | 0.79 | 0.86 | 0.47 | 0.64 | 0.42 |
| <b>SEQM/<br/>DFT<br/>hybrid</b> | <b>AM1/B3LYP<sub>g</sub></b>      | 0.90  | 0.94  | 0.90 | 0.77 | 0.67 | 0.91 | 0.66 |
|                                 | <b>PM7/B3LYP<sub>g</sub></b>      | 0.97  | 0.999 | 0.94 | 0.75 | 0.69 | 0.92 | 0.67 |
|                                 | <b>AM1/B3LYP<sub>s</sub></b>      | 0.97  | 0.90  | 0.93 | 0.82 | 0.69 | 0.95 | 0.60 |
|                                 | <b>PM7/B3LYP<sub>s</sub></b>      | 0.94  | 0.97  | 0.94 | 0.79 | 0.72 | 0.94 | 0.65 |
| <b>DFTB/<br/>DFT<br/>hybrid</b> | <b>GFN1-xTB/B3LYP<sub>g</sub></b> | 0.98  | 0.95  | 0.93 | 0.76 | 0.64 | 0.89 | 0.65 |
|                                 | <b>SCC-DFTB/B3LYP<sub>g</sub></b> | 0.97  | 0.99  | 0.95 | 0.86 | 0.69 | 0.91 | 0.60 |
|                                 | <b>GFN1-xTB/B3LYP<sub>s</sub></b> | 0.85  | 0.97  | 0.96 | 0.81 | 0.67 | 0.94 | 0.63 |
|                                 | <b>SCC-DFTB/B3LYP<sub>s</sub></b> | 0.94  | 0.93  | 0.98 | 0.91 | 0.70 | 0.95 | 0.55 |

**Table S7.**  $R^2$  of HOMO energy of the product molecules as computed with DFT, SEQM, DFTB and hybrid schemes of SEQM (or DFTB) and DFT methods for the seven datasets.

|                                 |                                   | No.1  | No.2   | No.3  | No.4  | No.5 | No.6 | No.7 |
|---------------------------------|-----------------------------------|-------|--------|-------|-------|------|------|------|
| <b>DFT</b>                      | <b>PBE<sub>g</sub></b>            | 0.58  | 0.46   | 0.38  | 0.51  | 0.16 | 0.65 | 0.80 |
|                                 | <b>B3LYP<sub>g</sub></b>          | 0.54  | 0.84   | 0.39  | 0.030 | 0.61 | 0.63 | 0.69 |
|                                 | <b>PBE-D3<sub>g</sub></b>         | 0.58  | 0.45   | 0.38  | 0.42  | 0.15 | 0.75 | 0.80 |
|                                 | <b>B3LYP-D3<sub>g</sub></b>       | 0.54  | 0.88   | 0.40  | 0.030 | 0.61 | 0.82 | 0.69 |
|                                 | <b>PBE<sub>s</sub></b>            | 0.85  | 0.44   | 0.72  | 0.77  | 0.43 | 0.73 | 0.72 |
|                                 | <b>B3LYP<sub>s</sub></b>          | 0.87  | 0.87   | 0.50  | 0.61  | 0.77 | 0.88 | 0.61 |
|                                 | <b>PBE-D3<sub>s</sub></b>         | 0.86  | 0.40   | 0.72  | 0.73  | 0.41 | 0.82 | 0.73 |
|                                 | <b>B3LYP-D3<sub>s</sub></b>       | 0.88  | 0.89   | 0.50  | 0.61  | 0.78 | 0.88 | 0.59 |
| <b>SEQM</b>                     | <b>AM1</b>                        | 0.78  | 0.93   | 0.22  | 0.67  | 0.68 | 0.75 | 0.71 |
|                                 | <b>MNDO</b>                       | 0.90  | 0.059  | 0.17  | 0.83  | 0.45 | 0.75 | 0.50 |
|                                 | <b>MNDOD</b>                      | 0.48  | 0.024  | 0.069 | 0.80  | 0.57 | 0.62 | 0.11 |
|                                 | <b>PM3</b>                        | 0.90  | 0.80   | 0.11  | 0.83  | 0.76 | 0.81 | 0.42 |
|                                 | <b>PM6</b>                        | 0.95  | 0.75   | 0.083 | 0.59  | 0.50 | 0.85 | 0.58 |
|                                 | <b>PM6-D3H4X</b>                  | 0.94  | 0.74   | 0.081 | 0.59  | 0.47 | 0.85 | 0.58 |
|                                 | <b>PM7</b>                        | 0.90  | 0.91   | 0.14  | 0.37  | 0.38 | 0.74 | 0.68 |
| <b>DFTB</b>                     | <b>GFN1-xTB</b>                   | 0.98  | 0.90   | 0.88  | 0.36  | 0.69 | 0.73 | 0.75 |
|                                 | <b>SCC-DFTB</b>                   | 0.019 | 0.0037 | 0.081 | 0.84  | 0.14 | 0.95 | 0.18 |
| <b>SEQM/<br/>DFT<br/>hybrid</b> | <b>AM1/B3LYP<sub>g</sub></b>      | 0.84  | 0.93   | 0.59  | 0.039 | 0.61 | 0.66 | 0.86 |
|                                 | <b>PM7/B3LYP<sub>g</sub></b>      | 0.87  | 0.71   | 0.42  | 0.055 | 0.41 | 0.59 | 0.82 |
|                                 | <b>AM1/B3LYP<sub>s</sub></b>      | 0.88  | 0.998  | 0.77  | 0.73  | 0.71 | 0.83 | 0.65 |
|                                 | <b>PM7/B3LYP<sub>s</sub></b>      | 0.80  | 0.93   | 0.60  | 0.72  | 0.64 | 0.81 | 0.72 |
| <b>DFTB/<br/>DFT<br/>hybrid</b> | <b>GFN1-xTB/B3LYP<sub>g</sub></b> | 0.86  | 0.74   | 0.44  | 0.25  | 0.64 | 0.66 | 0.72 |
|                                 | <b>SCC-DFTB/B3LYP<sub>g</sub></b> | 0.90  | 0.96   | 0.34  | 0.24  | 0.65 | 0.65 | 0.57 |
|                                 | <b>GFN1-xTB/B3LYP<sub>s</sub></b> | 0.77  | 0.87   | 0.49  | 0.84  | 0.69 | 0.80 | 0.60 |
|                                 | <b>SCC-DFTB/B3LYP<sub>s</sub></b> | 0.95  | 0.97   | 0.38  | 0.85  | 0.70 | 0.76 | 0.48 |

**Table S8.** Average NRMSE of the seven datasets for LUMO descriptor as calculated with B3LYP, SEQM, DFTB, and the hybrid schemes of SEQM (or DFTB) and B3LYP.

| Methods            | Average NRMSE | Methods                     | Average NRMSE |
|--------------------|---------------|-----------------------------|---------------|
| B3LYP <sub>g</sub> | 12.65%        | AM1/B3LYP <sub>g</sub>      | 13.83%        |
| AM1                | 16.10%        | PM7/B3LYP <sub>g</sub>      | 11.46%        |
| MNDO               | 19.61%        | AM1/B3LYP <sub>s</sub>      | 12.76%        |
| MNDOD              | 17.50%        | PM7/B3LYP <sub>s</sub>      | 12.25%        |
| PM3                | 18.17%        | GFN1-xTB/B3LYP <sub>g</sub> | 12.99%        |
| PM6                | 17.27%        | SCC-DFTB/B3LYP <sub>g</sub> | 11.60%        |
| PM6-D3H4X          | 17.16%        | GFN1-xTB/B3LYP <sub>s</sub> | 13.11%        |
| PM7                | 17.13%        | SCC-DFTB/B3LYP <sub>s</sub> | 12.01%        |
| GFN1-xTB           | 15.85%        |                             |               |
| SCC-DFTB           | 19.60%        |                             |               |

**Table S9.** Summary of operation voltage and charge/discharge windows for the seven datasets.

| Dataset | Molecular structure                                                                 | Operation voltage<br>(vs. Li/Li <sup>+</sup> ) | Charge/discharge window<br>(vs. Li/Li <sup>+</sup> ) |
|---------|-------------------------------------------------------------------------------------|------------------------------------------------|------------------------------------------------------|
| 1       |    | 2.5                                            | 1.2 – 4.3                                            |
|         |    | 3.0                                            |                                                      |
|         |    | 3.1                                            |                                                      |
|         |    | 3.1                                            |                                                      |
| 2       |    | 2.61                                           |                                                      |
|         |    | 2.52                                           |                                                      |
|         |   | 2.71                                           |                                                      |
|         |  | 2.27                                           |                                                      |
| 3       |  | 2.61                                           | Not given                                            |
|         |  | 2.68                                           |                                                      |
|         |  | 2.74                                           |                                                      |
|         |  | 2.93                                           |                                                      |
|         |  | 2.27                                           |                                                      |
| 4       |  | 3.28                                           | 1.5 – 4.0                                            |
|         |  | 2.35                                           |                                                      |
|         |  | 2.01                                           |                                                      |

|   |                                                                                     |      |           |
|---|-------------------------------------------------------------------------------------|------|-----------|
|   | 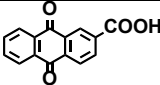   | 2.04 |           |
|   |    | 1.86 |           |
|   |    | 1.73 |           |
| 5 |    | 2.8  | 1.5 – 4.2 |
|   |    | 2.8  |           |
|   |    | 2.9  |           |
|   |    | 2.6  |           |
|   |   | 2.7  |           |
|   |  | 2.7  |           |
|   |  | 2.6  |           |
|   |  | 2.7  |           |
| 6 |  | 2.4  | 1.5 – 3.5 |
|   |  | 2.1  |           |
|   |  | 1.7  |           |
|   |  | 2.5  |           |

|   |                                                                                   |      |  |
|---|-----------------------------------------------------------------------------------|------|--|
|   |  | 2.7  |  |
| 7 |  | 1.92 |  |
|   |  | 1.79 |  |
|   |  | 2.53 |  |
|   |  | 2.11 |  |
|   |  | 2.32 |  |
|   |  | 2.39 |  |
|   |  | 2.61 |  |

**Table S10.** The 2D structures of seven quinones, and zero-point energy (*ZPE*) of quinone reactants and lithiated products and their difference on *ZPE*, as calculated with the functionals of PBE and B3LYP in gas phase.

| 2D molecules                                                                        | PBE                          |                             |                    | B3LYP                        |                             |                    |
|-------------------------------------------------------------------------------------|------------------------------|-----------------------------|--------------------|------------------------------|-----------------------------|--------------------|
|                                                                                     | <i>ZPE</i> for reactant (eV) | <i>ZPE</i> for product (eV) | $\Delta(ZPE)$ (eV) | <i>ZPE</i> for reactant (eV) | <i>ZPE</i> for product (eV) | $\Delta(ZPE)$ (eV) |
|    | 2.25                         | 2.32                        | 0.07               | 2.32                         | 2.36                        | 0.04               |
|    | 3.51                         | 3.56                        | 0.05               | 3.61                         | 3.69                        | 0.08               |
|    | 4.77                         | 4.81                        | 0.04               | 4.91                         | 4.92                        | 0.01               |
|    | 5.16                         | 5.20                        | 0.04               | 5.31                         | 5.36                        | 0.05               |
|  | 5.19                         | 5.27                        | 0.08               | 5.33                         | 5.41                        | 0.08               |
|  | 5.61                         | 5.71                        | 0.10               | 5.76                         | 5.86                        | 0.10               |
|  | 4.70                         | 4.83                        | 0.13               | 4.84                         | 4.96                        | 0.12               |

**Table S11.** RMSE of  $\Delta E_r$  as computed with DFT, SEQM, DFTB and hybrid schemes of SEQM (or DFTB) and DFT methods for the seven datasets.

|                                 |                                   | No.1  | No.2  | No.3  | No.4 | No.5  | No.6  | No.7 |
|---------------------------------|-----------------------------------|-------|-------|-------|------|-------|-------|------|
| <b>DFT</b>                      | <b>PBE<sub>g</sub></b>            | 0.019 | 0.13  | 0.034 | 0.21 | 0.064 | 0.19  | 0.15 |
|                                 | <b>B3LYP<sub>g</sub></b>          | 0.019 | 0.11  | 0.047 | 0.29 | 0.066 | 0.18  | 0.15 |
|                                 | <b>PBE-D3<sub>g</sub></b>         | 0.019 | 0.13  | 0.034 | 0.26 | 0.064 | 0.17  | 0.15 |
|                                 | <b>B3LYP-D3<sub>g</sub></b>       | 0.023 | 0.11  | 0.049 | 0.29 | 0.066 | 0.18  | 0.15 |
|                                 | <b>PBE<sub>s</sub></b>            | 0.059 | 0.017 | 0.027 | 0.17 | 0.058 | 0.123 | 0.16 |
|                                 | <b>B3LYP<sub>s</sub></b>          | 0.064 | 0.021 | 0.019 | 0.19 | 0.050 | 0.14  | 0.15 |
|                                 | <b>PBE-D3<sub>s</sub></b>         | 0.050 | 0.018 | 0.026 | 0.17 | 0.049 | 0.12  | 0.16 |
|                                 | <b>B3LYP-D3<sub>s</sub></b>       | 0.052 | 0.020 | 0.018 | 0.21 | 0.047 | 0.12  | 0.15 |
| <b>SEQM</b>                     | <b>AM1</b>                        | 0.14  | 0.086 | 0.073 | 0.24 | 0.066 | 0.13  | 0.15 |
|                                 | <b>MNDO</b>                       | 0.15  | 0.16  | 0.21  | 0.15 | 0.067 | 0.30  | 0.28 |
|                                 | <b>MNDOD</b>                      | 0.060 | 0.16  | 0.21  | 0.15 | 0.060 | 0.22  | 0.27 |
|                                 | <b>PM3</b>                        | 0.21  | 0.15  | 0.18  | 0.13 | 0.086 | 0.18  | 0.18 |
|                                 | <b>PM6</b>                        | 0.051 | 0.14  | 0.092 | 0.19 | 0.065 | 0.15  | 0.14 |
|                                 | <b>PM6-D3H4X</b>                  | 0.052 | 0.14  | 0.092 | 0.19 | 0.065 | 0.15  | 0.14 |
|                                 | <b>PM7</b>                        | 0.040 | 0.13  | 0.11  | 0.21 | 0.060 | 0.16  | 0.13 |
| <b>DFTB</b>                     | <b>GFN1-xTB</b>                   | 0.016 | 0.15  | 0.095 | 0.17 | 0.053 | 0.093 | 0.19 |
|                                 | <b>SCC-DFTB</b>                   | 0.13  | 0.15  | 0.15  | 0.13 | 0.094 | 0.28  | 0.23 |
| <b>SEQM/<br/>DFT<br/>hybrid</b> | <b>AM1/B3LYP<sub>g</sub></b>      | 0.045 | 0.13  | 0.046 | 0.21 | 0.061 | 0.15  | 0.16 |
|                                 | <b>PM7/B3LYP<sub>g</sub></b>      | 0.084 | 0.13  | 0.047 | 0.19 | 0.077 | 0.18  | 0.15 |
|                                 | <b>AM1/B3LYP<sub>s</sub></b>      | 0.020 | 0.072 | 0.038 | 0.16 | 0.050 | 0.085 | 0.16 |
|                                 | <b>PM7/B3LYP<sub>s</sub></b>      | 0.23  | 0.086 | 0.045 | 0.17 | 0.074 | 0.12  | 0.14 |
| <b>DFTB/<br/>DFT<br/>hybrid</b> | <b>GFN1-xTB/B3LYP<sub>g</sub></b> | 0.069 | 0.12  | 0.042 | 0.18 | 0.066 | 0.16  | 0.14 |
|                                 | <b>SCC-DFTB/B3LYP<sub>g</sub></b> | 0.046 | 0.10  | 0.045 | 0.17 | 0.062 | 0.14  | 0.17 |
|                                 | <b>GFN1-xTB/B3LYP<sub>s</sub></b> | 0.24  | 0.13  | 0.056 | 0.14 | 0.061 | 0.091 | 0.14 |
|                                 | <b>SCC-DFTB/B3LYP<sub>s</sub></b> | 0.20  | 0.12  | 0.11  | 0.16 | 0.042 | 0.12  | 0.22 |

**Table S12.** RMSE of LUMO energy of the reactant molecules as computed with DFT, SEQM, DFTB and hybrid schemes of SEQM (or DFTB) and DFT methods for the seven datasets.

|                                 |                                   | No.1  | No.2   | No.3  | No.4 | No.5  | No.6  | No.7 |
|---------------------------------|-----------------------------------|-------|--------|-------|------|-------|-------|------|
| <b>DFT</b>                      | <b>PBE<sub>g</sub></b>            | 0.038 | 0.043  | 0.070 | 0.24 | 0.056 | 0.13  | 0.17 |
|                                 | <b>B3LYP<sub>g</sub></b>          | 0.031 | 0.029  | 0.059 | 0.25 | 0.056 | 0.12  | 0.17 |
|                                 | <b>PBE-D3<sub>g</sub></b>         | 0.040 | 0.043  | 0.070 | 0.24 | 0.057 | 0.13  | 0.17 |
|                                 | <b>B3LYP-D3<sub>g</sub></b>       | 0.033 | 0.029  | 0.060 | 0.25 | 0.056 | 0.12  | 0.17 |
|                                 | <b>PBE<sub>s</sub></b>            | 0.017 | 0.016  | 0.065 | 0.23 | 0.056 | 0.11  | 0.19 |
|                                 | <b>B3LYP<sub>s</sub></b>          | 0.030 | 0.023  | 0.044 | 0.22 | 0.053 | 0.093 | 0.18 |
|                                 | <b>PBE-D3<sub>s</sub></b>         | 0.025 | 0.022  | 0.063 | 0.23 | 0.056 | 0.11  | 0.19 |
|                                 | <b>B3LYP-D3<sub>s</sub></b>       | 0.033 | 0.024  | 0.044 | 0.21 | 0.054 | 0.087 | 0.18 |
| <b>SEQM</b>                     | <b>AM1</b>                        | 0.037 | 0.027  | 0.11  | 0.36 | 0.052 | 0.19  | 0.20 |
|                                 | <b>MNDO</b>                       | 0.047 | 0.10   | 0.11  | 0.41 | 0.060 | 0.18  | 0.21 |
|                                 | <b>MNDOD</b>                      | 0.036 | 0.055  | 0.097 | 0.41 | 0.055 | 0.18  | 0.22 |
|                                 | <b>PM3</b>                        | 0.015 | 0.11   | 0.13  | 0.35 | 0.043 | 0.20  | 0.20 |
|                                 | <b>PM6</b>                        | 0.048 | 0.043  | 0.11  | 0.37 | 0.050 | 0.21  | 0.21 |
|                                 | <b>PM6-D3H4X</b>                  | 0.039 | 0.043  | 0.11  | 0.37 | 0.053 | 0.21  | 0.21 |
|                                 | <b>PM7</b>                        | 0.038 | 0.051  | 0.11  | 0.36 | 0.051 | 0.21  | 0.20 |
| <b>DFTB</b>                     | <b>GFN1-xTB</b>                   | 0.075 | 0.030  | 0.11  | 0.22 | 0.057 | 0.18  | 0.20 |
|                                 | <b>SCC-DFTB</b>                   | 0.026 | 0.15   | 0.099 | 0.19 | 0.070 | 0.21  | 0.22 |
| <b>SEQM/<br/>DFT<br/>hybrid</b> | <b>AM1/B3LYP<sub>g</sub></b>      | 0.077 | 0.039  | 0.067 | 0.25 | 0.055 | 0.10  | 0.17 |
|                                 | <b>PM7/B3LYP<sub>g</sub></b>      | 0.041 | 0.0060 | 0.051 | 0.26 | 0.054 | 0.098 | 0.16 |
|                                 | <b>AM1/B3LYP<sub>s</sub></b>      | 0.043 | 0.051  | 0.057 | 0.22 | 0.054 | 0.081 | 0.18 |
|                                 | <b>PM7/B3LYP<sub>s</sub></b>      | 0.059 | 0.030  | 0.052 | 0.23 | 0.051 | 0.084 | 0.17 |
| <b>DFTB/<br/>DFT<br/>hybrid</b> | <b>GFN1-xTB/B3LYP<sub>g</sub></b> | 0.039 | 0.036  | 0.057 | 0.25 | 0.058 | 0.11  | 0.17 |
|                                 | <b>SCC-DFTB/B3LYP<sub>g</sub></b> | 0.045 | 0.016  | 0.048 | 0.19 | 0.054 | 0.10  | 0.18 |
|                                 | <b>GFN1-xTB/B3LYP<sub>s</sub></b> | 0.096 | 0.030  | 0.043 | 0.22 | 0.055 | 0.084 | 0.17 |
|                                 | <b>SCC-DFTB/B3LYP<sub>s</sub></b> | 0.061 | 0.043  | 0.034 | 0.15 | 0.053 | 0.079 | 0.19 |

**Table S13.** RMSE of HOMO energy of the product molecules as computed with DFT, SEQM, DFTB and hybrid schemes of SEQM (or DFTB) and DFT methods for the seven datasets.

|                                 |                                   | No.1  | No.2   | No.3  | No.4 | No.5  | No.6  | No.7 |
|---------------------------------|-----------------------------------|-------|--------|-------|------|-------|-------|------|
| <b>DFT</b>                      | <b>PBE<sub>g</sub></b>            | 0.16  | 0.12   | 0.17  | 0.36 | 0.089 | 0.21  | 0.13 |
|                                 | <b>B3LYP<sub>g</sub></b>          | 0.17  | 0.065  | 0.17  | 0.51 | 0.061 | 0.21  | 0.16 |
|                                 | <b>PBE-D3<sub>g</sub></b>         | 0.16  | 0.12   | 0.17  | 0.39 | 0.089 | 0.18  | 0.13 |
|                                 | <b>B3LYP-D3<sub>g</sub></b>       | 0.17  | 0.058  | 0.17  | 0.51 | 0.060 | 0.15  | 0.16 |
|                                 | <b>PBE<sub>s</sub></b>            | 0.095 | 0.12   | 0.11  | 0.25 | 0.073 | 0.18  | 0.15 |
|                                 | <b>B3LYP<sub>s</sub></b>          | 0.089 | 0.059  | 0.15  | 0.32 | 0.047 | 0.12  | 0.18 |
|                                 | <b>PBE-D3<sub>s</sub></b>         | 0.092 | 0.13   | 0.11  | 0.27 | 0.074 | 0.15  | 0.15 |
|                                 | <b>B3LYP-D3<sub>s</sub></b>       | 0.086 | 0.055  | 0.15  | 0.32 | 0.045 | 0.12  | 0.18 |
| <b>SEQM</b>                     | <b>AM1</b>                        | 0.12  | 0.042  | 0.19  | 0.30 | 0.055 | 0.17  | 0.15 |
|                                 | <b>MNDO</b>                       | 0.080 | 0.16   | 0.20  | 0.21 | 0.072 | 0.18  | 0.20 |
|                                 | <b>MNDOD</b>                      | 0.18  | 0.16   | 0.21  | 0.23 | 0.063 | 0.22  | 0.27 |
|                                 | <b>PM3</b>                        | 0.077 | 0.074  | 0.20  | 0.21 | 0.047 | 0.15  | 0.22 |
|                                 | <b>PM6</b>                        | 0.054 | 0.082  | 0.21  | 0.33 | 0.068 | 0.14  | 0.19 |
|                                 | <b>PM6-D3H4X</b>                  | 0.059 | 0.083  | 0.21  | 0.33 | 0.071 | 0.14  | 0.19 |
|                                 | <b>PM7</b>                        | 0.077 | 0.048  | 0.20  | 0.41 | 0.076 | 0.18  | 0.16 |
| <b>DFTB</b>                     | <b>GFN1-xTB</b>                   | 0.031 | 0.052  | 0.074 | 0.41 | 0.054 | 0.18  | 0.14 |
|                                 | <b>SCC-DFTB</b>                   | 0.25  | 0.16   | 0.21  | 0.20 | 0.090 | 0.082 | 0.26 |
| <b>SEQM/<br/>DFT<br/>hybrid</b> | <b>AM1/B3LYP<sub>g</sub></b>      | 0.098 | 0.044  | 0.14  | 0.50 | 0.061 | 0.20  | 0.11 |
|                                 | <b>PM7/B3LYP<sub>g</sub></b>      | 0.088 | 0.088  | 0.17  | 0.50 | 0.074 | 0.22  | 0.12 |
|                                 | <b>AM1/B3LYP<sub>s</sub></b>      | 0.086 | 0.0080 | 0.10  | 0.27 | 0.052 | 0.14  | 0.17 |
|                                 | <b>PM7/B3LYP<sub>s</sub></b>      | 0.11  | 0.044  | 0.14  | 0.27 | 0.058 | 0.15  | 0.15 |
| <b>DFTB/<br/>DFT<br/>hybrid</b> | <b>GFN1-xTB/B3LYP<sub>g</sub></b> | 0.094 | 0.083  | 0.16  | 0.45 | 0.058 | 0.20  | 0.15 |
|                                 | <b>SCC-DFTB/B3LYP<sub>g</sub></b> | 0.080 | 0.032  | 0.18  | 0.45 | 0.058 | 0.21  | 0.19 |
|                                 | <b>GFN1-xTB/B3LYP<sub>s</sub></b> | 0.12  | 0.059  | 0.15  | 0.21 | 0.054 | 0.15  | 0.18 |
|                                 | <b>SCC-DFTB/B3LYP<sub>s</sub></b> | 0.057 | 0.030  | 0.17  | 0.20 | 0.053 | 0.17  | 0.21 |

### References:

- S1. Xu, K. Nonaqueous liquid electrolytes for lithium-based rechargeable batteries. *Chem. Rev.* **2004**, *104*, 4303–4418.
- S2. Prakongpan, S.; Nagai, T. Solubility of acetaminophen in cosolvents. *Chem. Pharm. Bull.* **1984**, *32*, 340–343.
- S3. Jouyban, A.; Soltanpour, S. Prediction of dielectric constants of binary solvents at various temperatures. *J. Chem. Eng. Data* **2010**, *55*, 2951–2963.
